# Supplementary material for: Impact of Cholesterol on the Stability of Monomeric and Dimeric Forms of the Translocator Protein TSPO: a Molecular Simulation Study
Source: Preprints.org preprint supplement (doi:10.20944/preprints202008.0425.v1), 2020-08-20
Supplement: Supplementary file 1 [file supplementary]

# Impact of cholesterol on the stability of monomeric and dimeric forms of the translocator protein TSPO: a molecular simulation study

Zeineb Si Chaib<sup>1,2,\*</sup>, Alessandro Marchetto<sup>3,\*</sup>, Klevia Dishnica<sup>3</sup>, Paolo Carloni<sup>1,2,4</sup>, Alejandro Giorgetti<sup>1,3,#</sup>, Giulia Rossetti<sup>1,5,6#</sup>

<sup>1</sup> Institute for Neuroscience and Medicine (INM-9) and Institute for Advanced Simulations (IAS-5) "Computational biomedicine", Forschungszentrum Jülich, 52425 Jülich, Germany.

<sup>2</sup> Faculty of Mathematics, Computer Science and Natural Sciences, RWTH Aachen, 52425 Aachen, Germany

<sup>3</sup> Department of Biotechnology, University of Verona, 37134 Verona, Italy

<sup>4</sup> Institute for Neuroscience and Medicine (INM-11) "Molecular Neuroscience and Neuroimaging", Forschungszentrum Jülich, 52425 Jülich

<sup>5</sup> Jülich Supercomputing Center (JSC), Forschungszentrum Jülich, 52425 Jülich, Germany

<sup>6</sup> Department of Oncology, Hematology, Oncology, Hemostaseology, and Stem Cell Transplantation University Hospital Aachen, RWTH Aachen University, Pauwelsstraße 30, 52074 Aachen, Germany.

# Correspondence: [g.rossetti@fz-juelich.de](mailto:g.rossetti@fz-juelich.de) (G.R.), [a.giorgetti@fz-juelich.de](mailto:a.giorgetti@fz-juelich.de) (A.G.)

\* Equally contributed to this work

## Supporting Information

**Table S1:** Overview of the simulated systems.

| Simulation                                  | Protein Structure            | Bilayer composition                                                                                                                                             | Duration of the MD     |
|---------------------------------------------|------------------------------|-----------------------------------------------------------------------------------------------------------------------------------------------------------------|------------------------|
| <i>m</i> TSPO and <i>m</i> TSPO_mon         | 2MGY                         | <b>OMM:</b> 40% POPC, 38.9% SDPE, 14.2% SDPS, 5.9% SAPI, 0.8% CDL2, and CHOL, 10% of total phospholipids<br><b>Chl_memb:</b> 31% POPC, 41% POPE and 28% CHOL.   | 8 $\mu$ s<br>8 $\mu$ s |
| <i>m</i> TSPO(Rs) and <i>m</i> TSPO(Rs)_mon | Homology model based on 4UC1 | <b>OMM:</b> 40% POPC, 38.9% SDPE, 14.2% SDPS, 5.9%, SAPI, 0.8% CDL2, and CHOL, 10% of total phospholipids)<br><b>Chl_memb:</b> 31% POPC, 41% POPE and 28% CHOL. | 8 $\mu$ s<br>8 $\mu$ s |
| <i>Rs</i> TSPO                              | 4UC3                         | <b>Rs_memb:</b> 20% POPC, 50% POPE, 24% POPG, 6% CDL2<br><b>Chl_memb:</b> 31% POPC, 41% POPE and 28% CHOL.                                                      | 2 $\mu$ s<br>2 $\mu$ s |
| <i>Bc</i> TSPO                              | 4RYI                         | <b>Bc_memb:</b> 43%POPE, 40%POPG, 17% CDL2<br><b>Chl_memb:</b> 31% POPC, 41% POPE and 28% CHOL.                                                                 | 2 $\mu$ s<br>2 $\mu$ s |

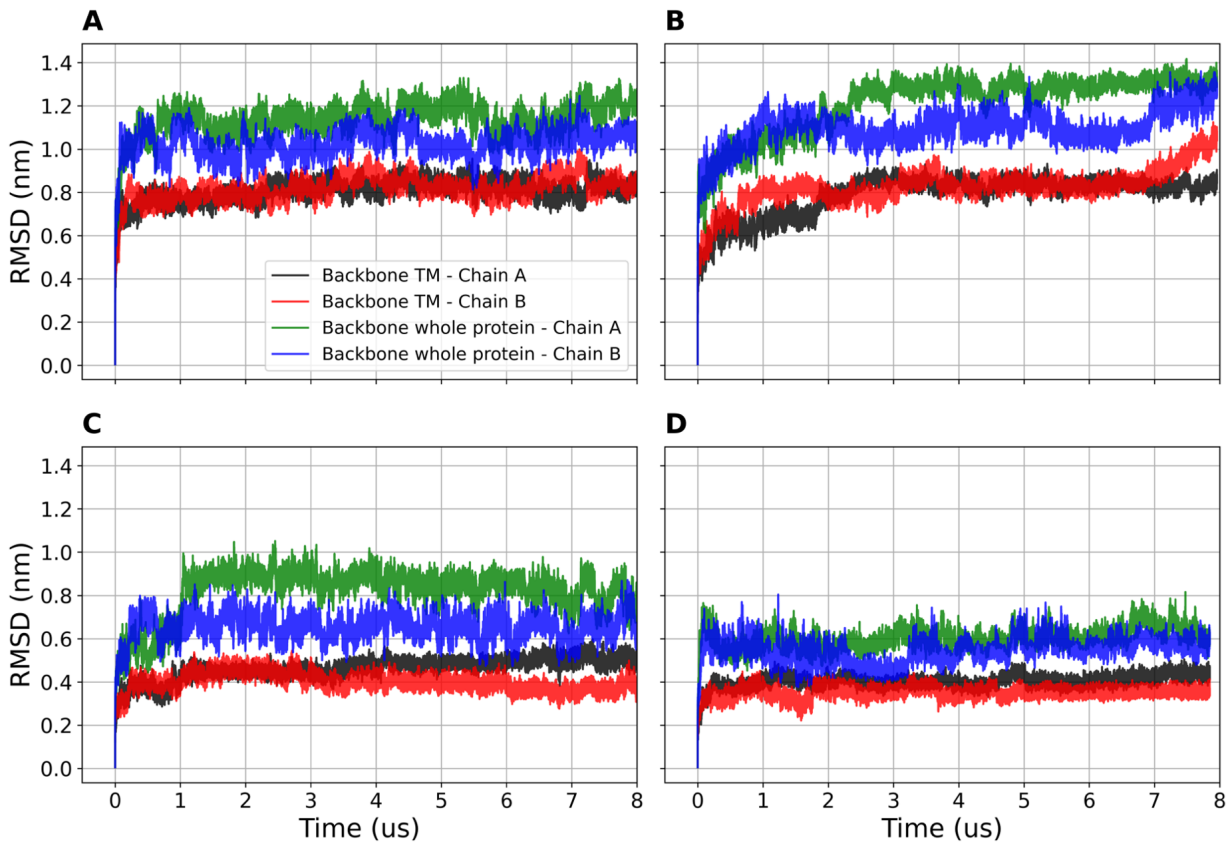

**Figure S1.** Backbone beads (for a definition of this, see [1]) RMSD of the whole protein and TM regions in **(A)** OMM and **(B)** *chl\_mem* for *mTSPO* and in **(C)** OMM and **(D)** *chl\_mem* for *mTSPO(Rs)*. The RMSDs are computed with respect to the initial structures in this and all the other figures presented here.

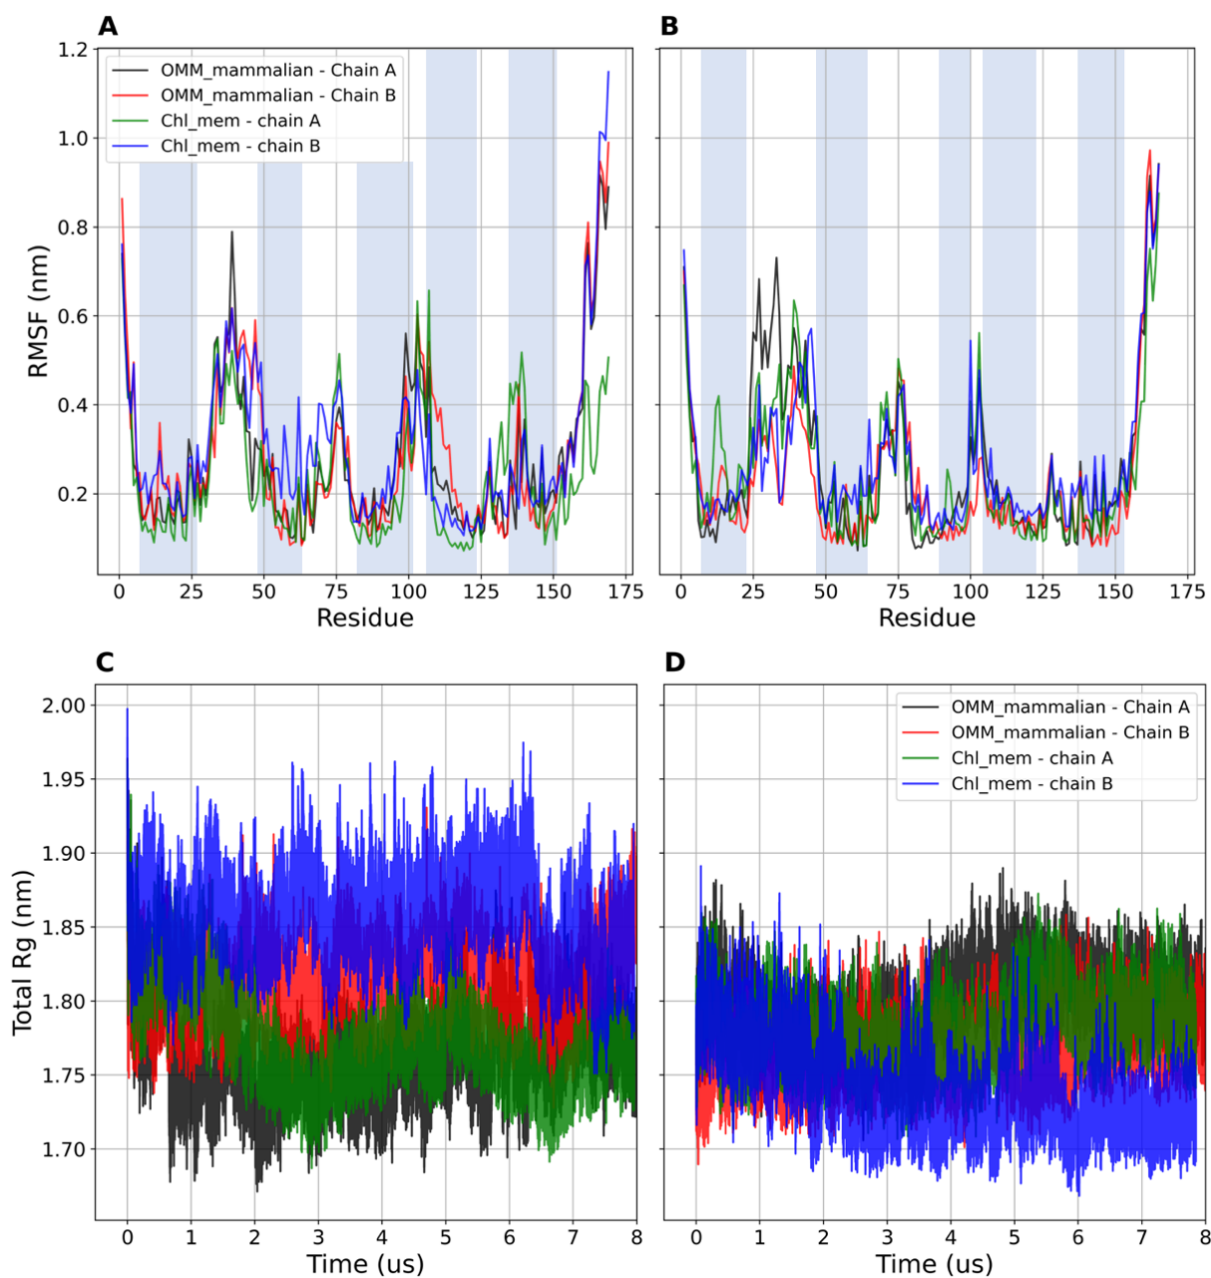

**Figure S2.** (A-B): RMSF values of each residue in (A) *mTSPO* and (B) *mTSPO*(Rs) embedded in both OMM and chl\_mem. The shaded blue regions correspond to the five TMs. The analysis was performed on the equilibrated part of the trajectory, that is for the last 6  $\mu$ s. (C-D): The radius of gyration (Rg) is plotted as a function of simulated time for (C) *mTSPO* and (D) *mTSPO*(Rs) embedded in both OMM and chl\_mem.

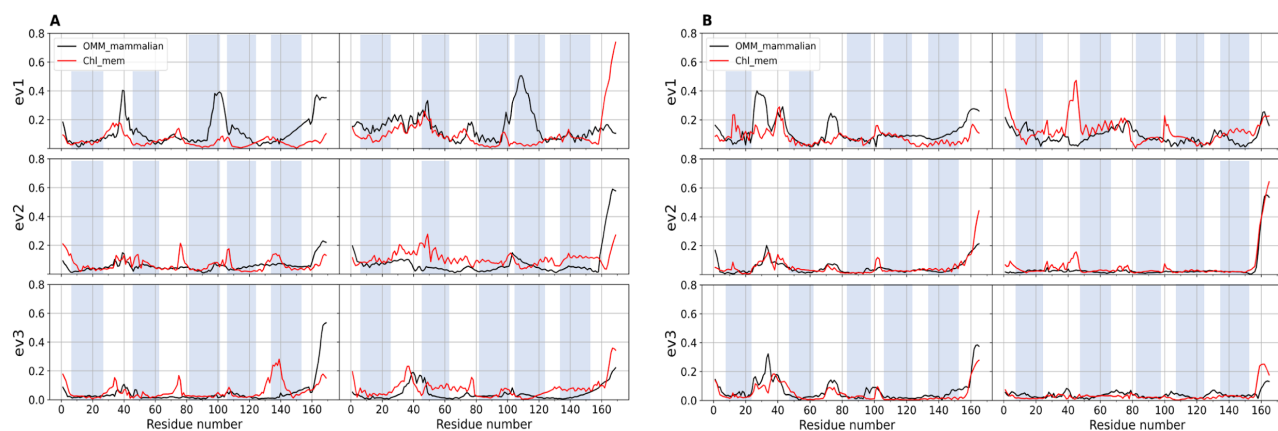

**Figure S3.** Projection of the backbone beads trajectory along the first three eigenvectors for both chains of **(A)** *mTSPO* and **(B)** *mTSPO*(Rs) dimeric structures. The shaded blue regions correspond to the five TMs. The analysis was performed on the equilibrated part of the trajectory, that is for the last 6  $\mu$ s.

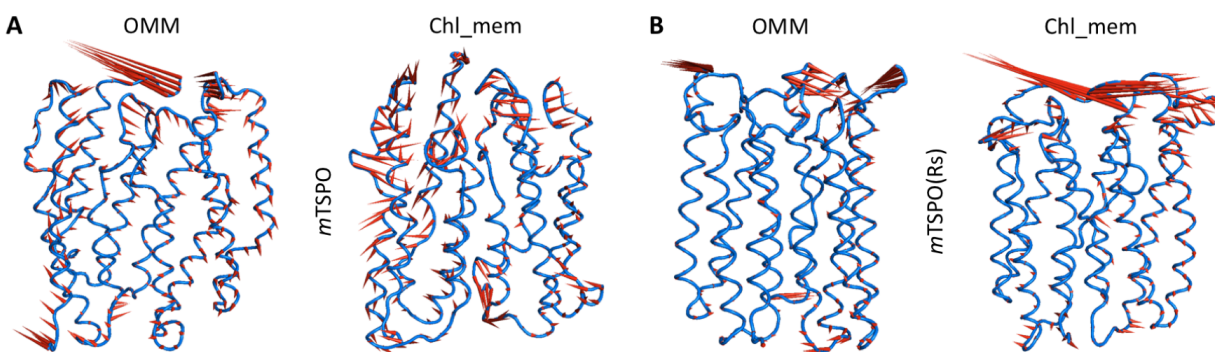

**Figure S4.** Porcupine plots depicting prominent motions averaged across the second normal mode for: **(A)** *mTSPO*, **(B)** *mTSPO*(Rs) in both OMM and chl\_mem. The analysis was performed on the equilibrated trajectory, namely for the last 6  $\mu$ s.



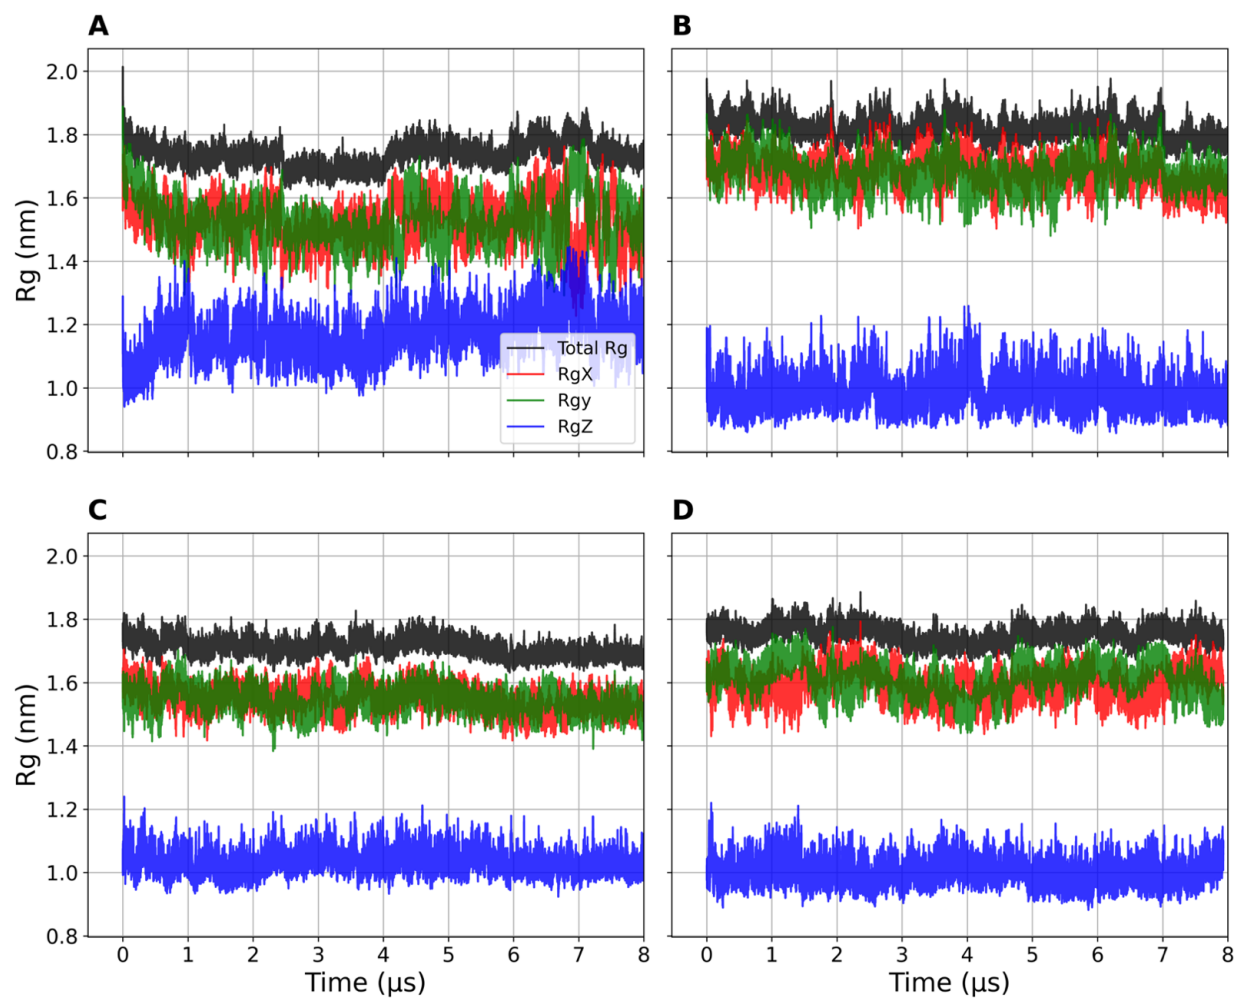

**Figure S5.** Radius of gyration (Rg) plotted as a function of the simulation time for *mTSPO\_mon* in **(A)** OMM and **(B)** chl\_mem, as well as for *mTSPO(Rs)\_mon* in **(C)** OMM and **(D)** Chl\_mem.

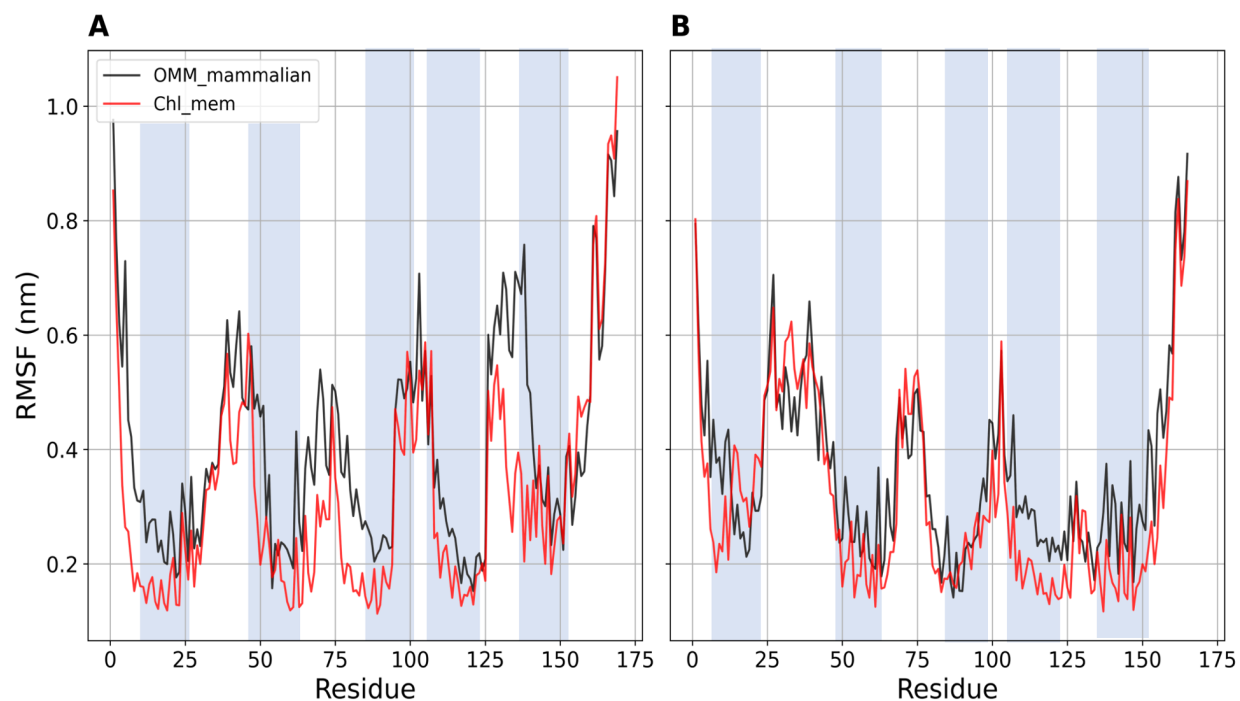

**Figure S6.** RMSF plots of (A) *mTSPO\_mon* and (B) *mTSPO(Rs)\_mon* in OMM and chl\_mem. The shadowed blue regions correspond to the TMs. The analysis was performed on the equilibrated trajectory, that is for the last 6  $\mu$ s.

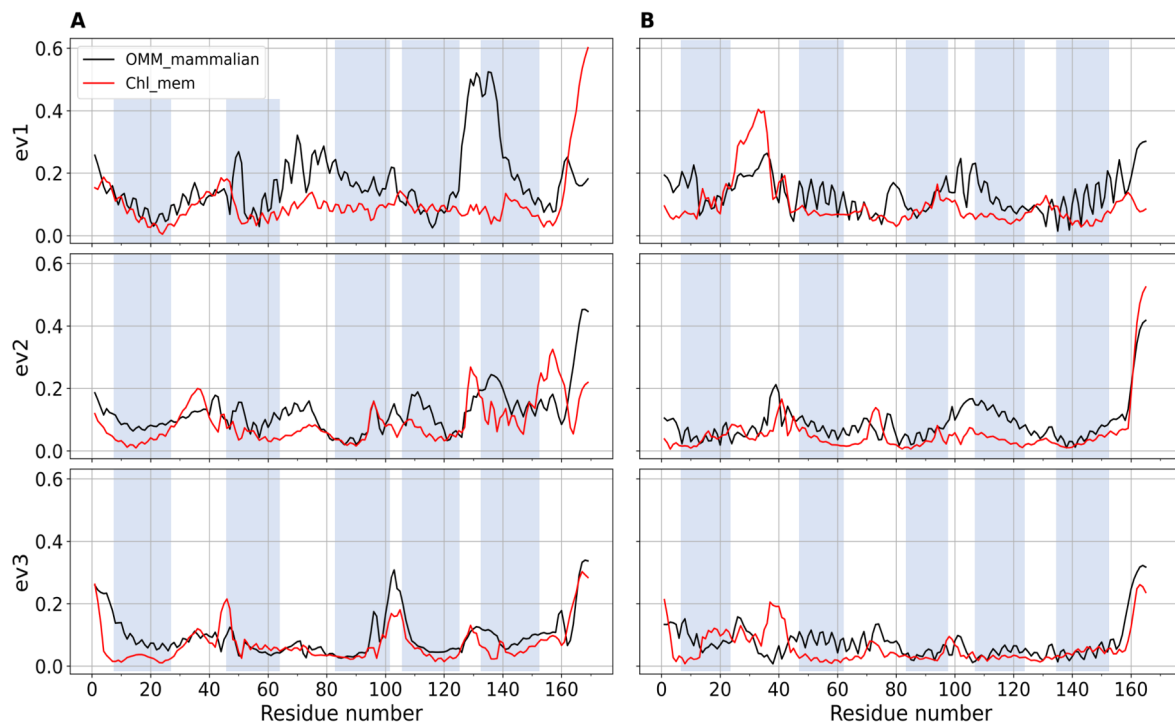

**Figure S7.** Projection of the backbone beads trajectory along the first three eigenvectors for (A) *mTSPO\_mon* and (B) *mTSPO(Rs)\_mon*. The shaded blue regions correspond to the five TMs. The analysis was performed on the equilibrated part of the trajectory, that is for the last 6  $\mu$ s.

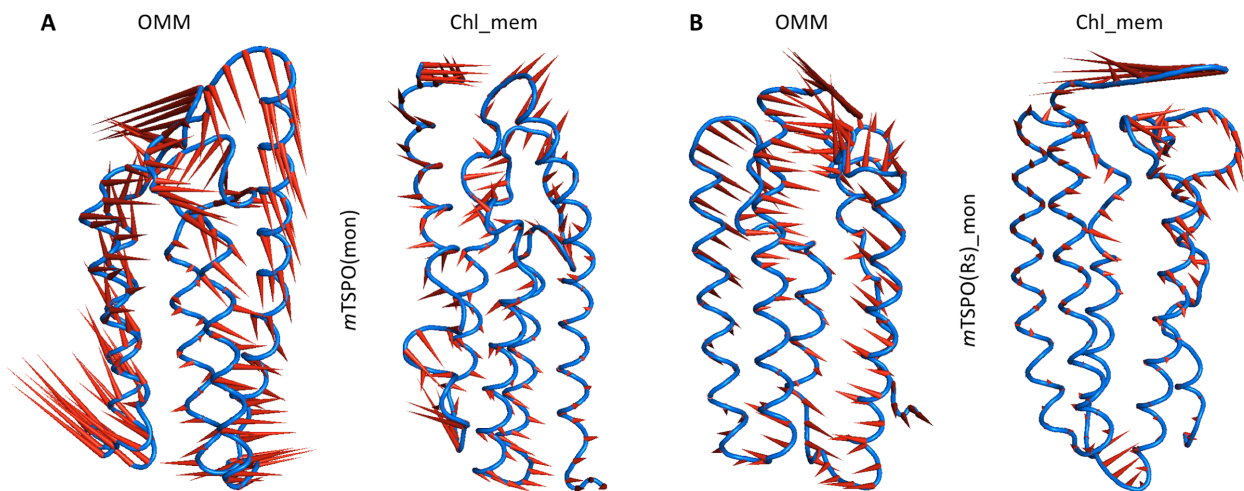

**Figure S8.** Porcupine plots depicting prominent motions averaged across the second normal mode for (A) *mTSPO\_mon* and (B) *mTSPO(Rs)\_mon*, in both OMM and chl\_mem. The analysis was performed on the equilibrated trajectory, that is for the last 6  $\mu$ s.

### Bacterial Dimers.

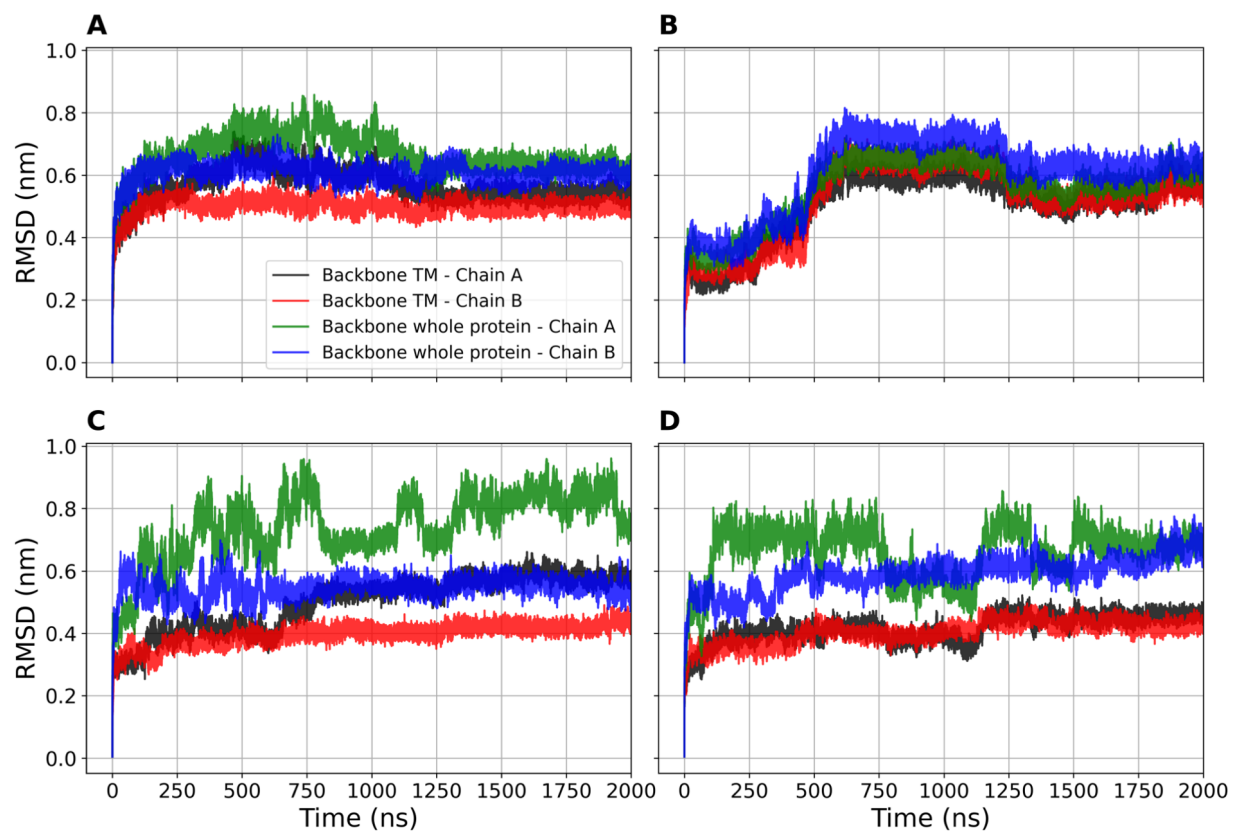

**Figure S9.** Backbone beads RMSD of the whole protein and TM regions for *BcTSPO* in (A) Bc\_mem and (B) chl\_mem, as well as for *RsTSPO* in (C) Rs\_mem and (D) in chl\_mem, plotted as a function of the simulation time.

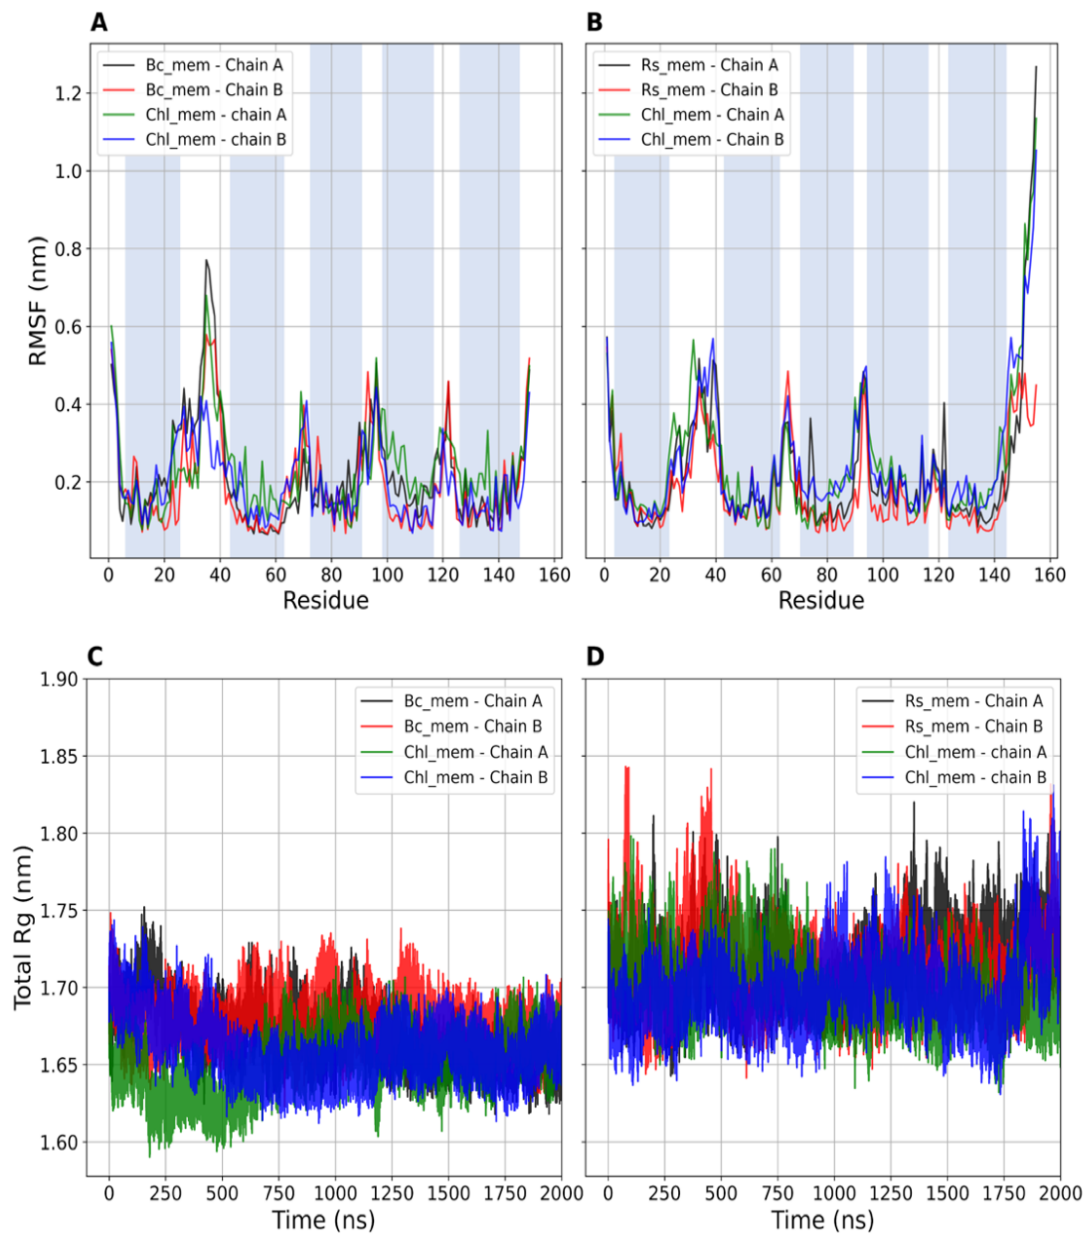

**Figure S10. (A-B):** RMSF values for each residue in (A) *Bc*TSPO in Bc\_mem and chl\_mem and (B) *Rs*TSPO in Rs\_mem and chl\_mem. (C-D): Radius of gyration (Rg) for (C) *Bc*TSPO in Bc\_mem and chl\_mem and (D) *Rs*TSPO in Rs\_mem and chl\_mem, plotted as a function of the simulated time. RMSF calculations were performed on the equilibrated part of the trajectories that is, for the last 1.3  $\mu$ s.

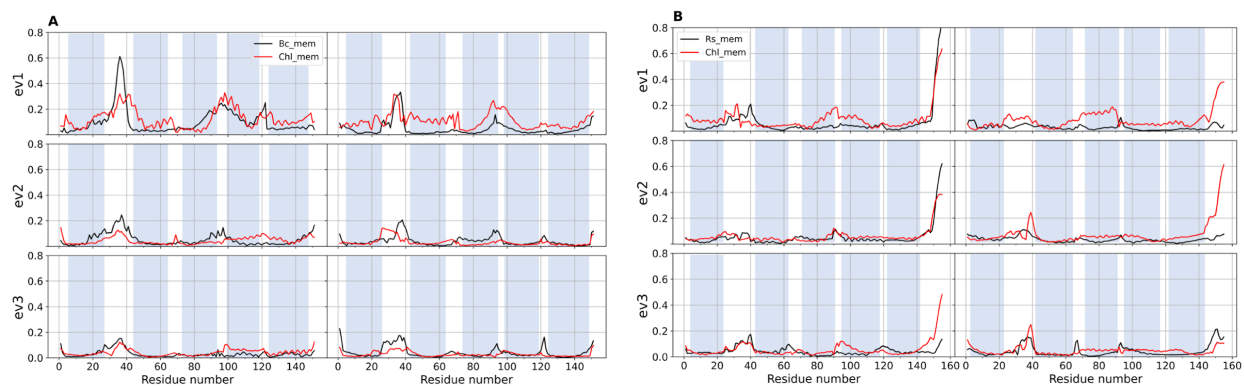

**Figure S11.** Projection of the backbone beads trajectory along the first three eigenvectors for (A) *BcTSPO* and (B) *RsTSPO*. The blue regions indicate the position of the TMs. The analysis was performed on the equilibrated part of the trajectory, that is, the last 1.3  $\mu$ s.

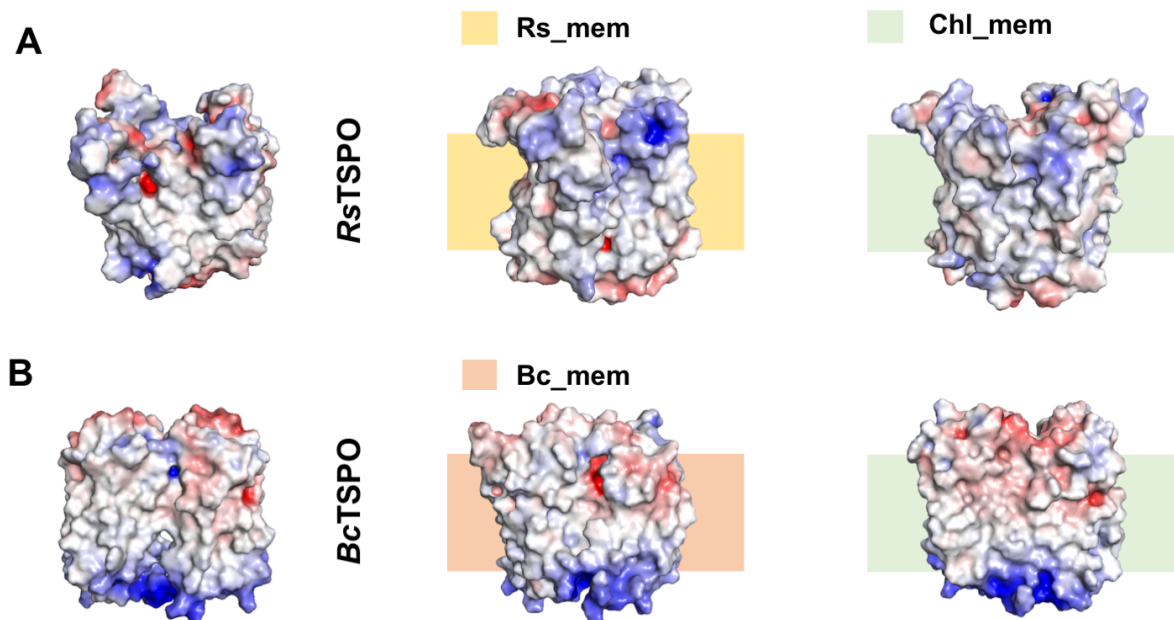

**Figure S12.** Electrostatic surface potentials in the initial and final MD structures for (A) *RsTSPO* and (B) *BcTSPO* embedded in *Rs\_mem*/*Bc\_mem* respectively and *chl\_mem*. The MD structures were backmapped to all-atom resolution using the backward.py script [2]. The red and blue surfaces represent negative and positive electrostatic potentials, respectively. The maximum values of the potentials are -5 kT/e, +5kT/e, respectively. Red and blue surfaces represent negative and positive electrostatic potentials (-5 kT/e, +5kT/e), respectively.

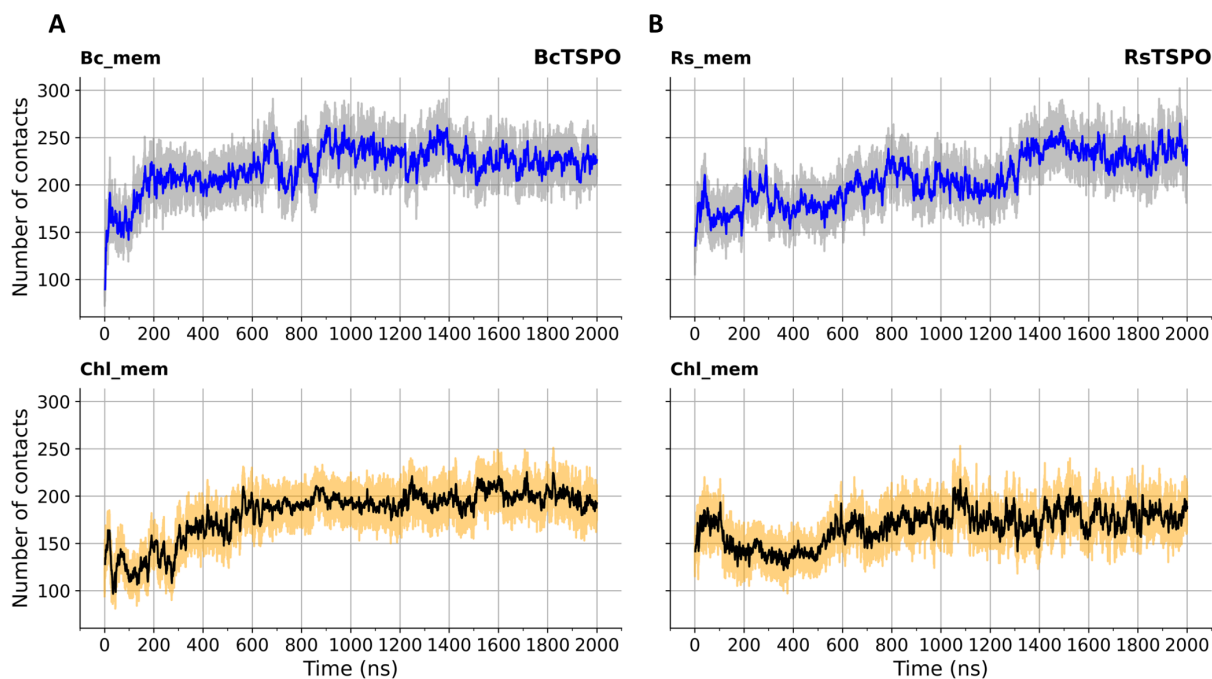

**Figure S13.** Number of subunit-subunit contact beads plotted as a function of the simulation time for **(A)** *BcTSPO* in *Bc\_mem* and *chl\_mem* and **(B)** *RsTSPO* in *Rs\_mem* and *chl\_mem*. For the definition of the contacts, see Methods Section in the main text.

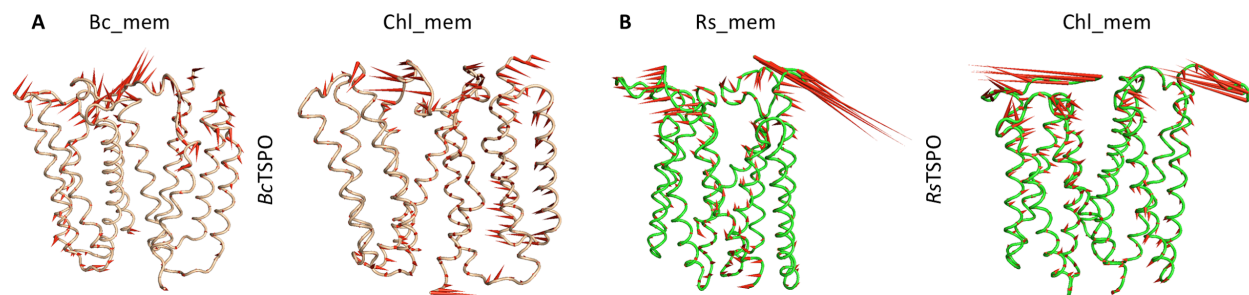

**Figure S14.** Porcupine plots depicting large scale motions averaged across the second normal mode for **(A)** *BcTSPO* embedded in *Bc\_mem* and *chl\_mem* and **(B)** *RsTSPO* embedded in *Rs\_mem* and *chl\_mem*. The analysis was performed on the equilibrated trajectory, that is for the last 1.3  $\mu$ s.



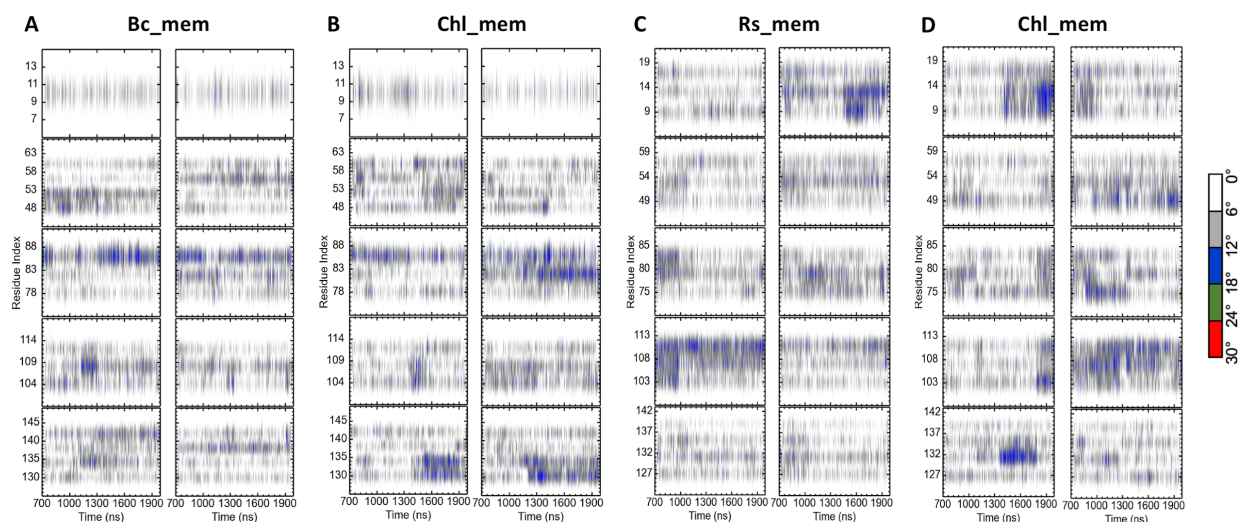

**Figure S15.** Helix bending of BcTSPO embedded in (A) Bc\_mem, (B) chl\_mem and for RsTSPO in (C) Rs\_mem and (D) chl\_mem, plotted as a function of the simulation time. The analysis was performed on the equilibrated part of the trajectories, that is, the last 1.3  $\mu$ s.

## References

1. de Jong, D.H.; Singh, G.; Bennett, W.D.; Amarez, C.; Wassenaar, T.A.; Schäfer, L.V.; Periole, X.; Tieleman, D.P.; Marrink, S.J. Improved parameters for the martini coarse-grained protein force field. *Journal of chemical theory and computation* **2013**, *9*, 687-697.
2. Wassenaar, T.A.; Pluhackova, K.; Böckmann, R.A.; Marrink, S.J.; Tieleman, D.P. Going backward: a flexible geometric approach to reverse transformation from coarse grained to atomistic models. *Journal of chemical theory and computation* **2014**, *10*, 676-690.
